# Supplementary material
Source: PubMed Central journal article supplement (PMC5358382)

Figure S1 A Parental continued

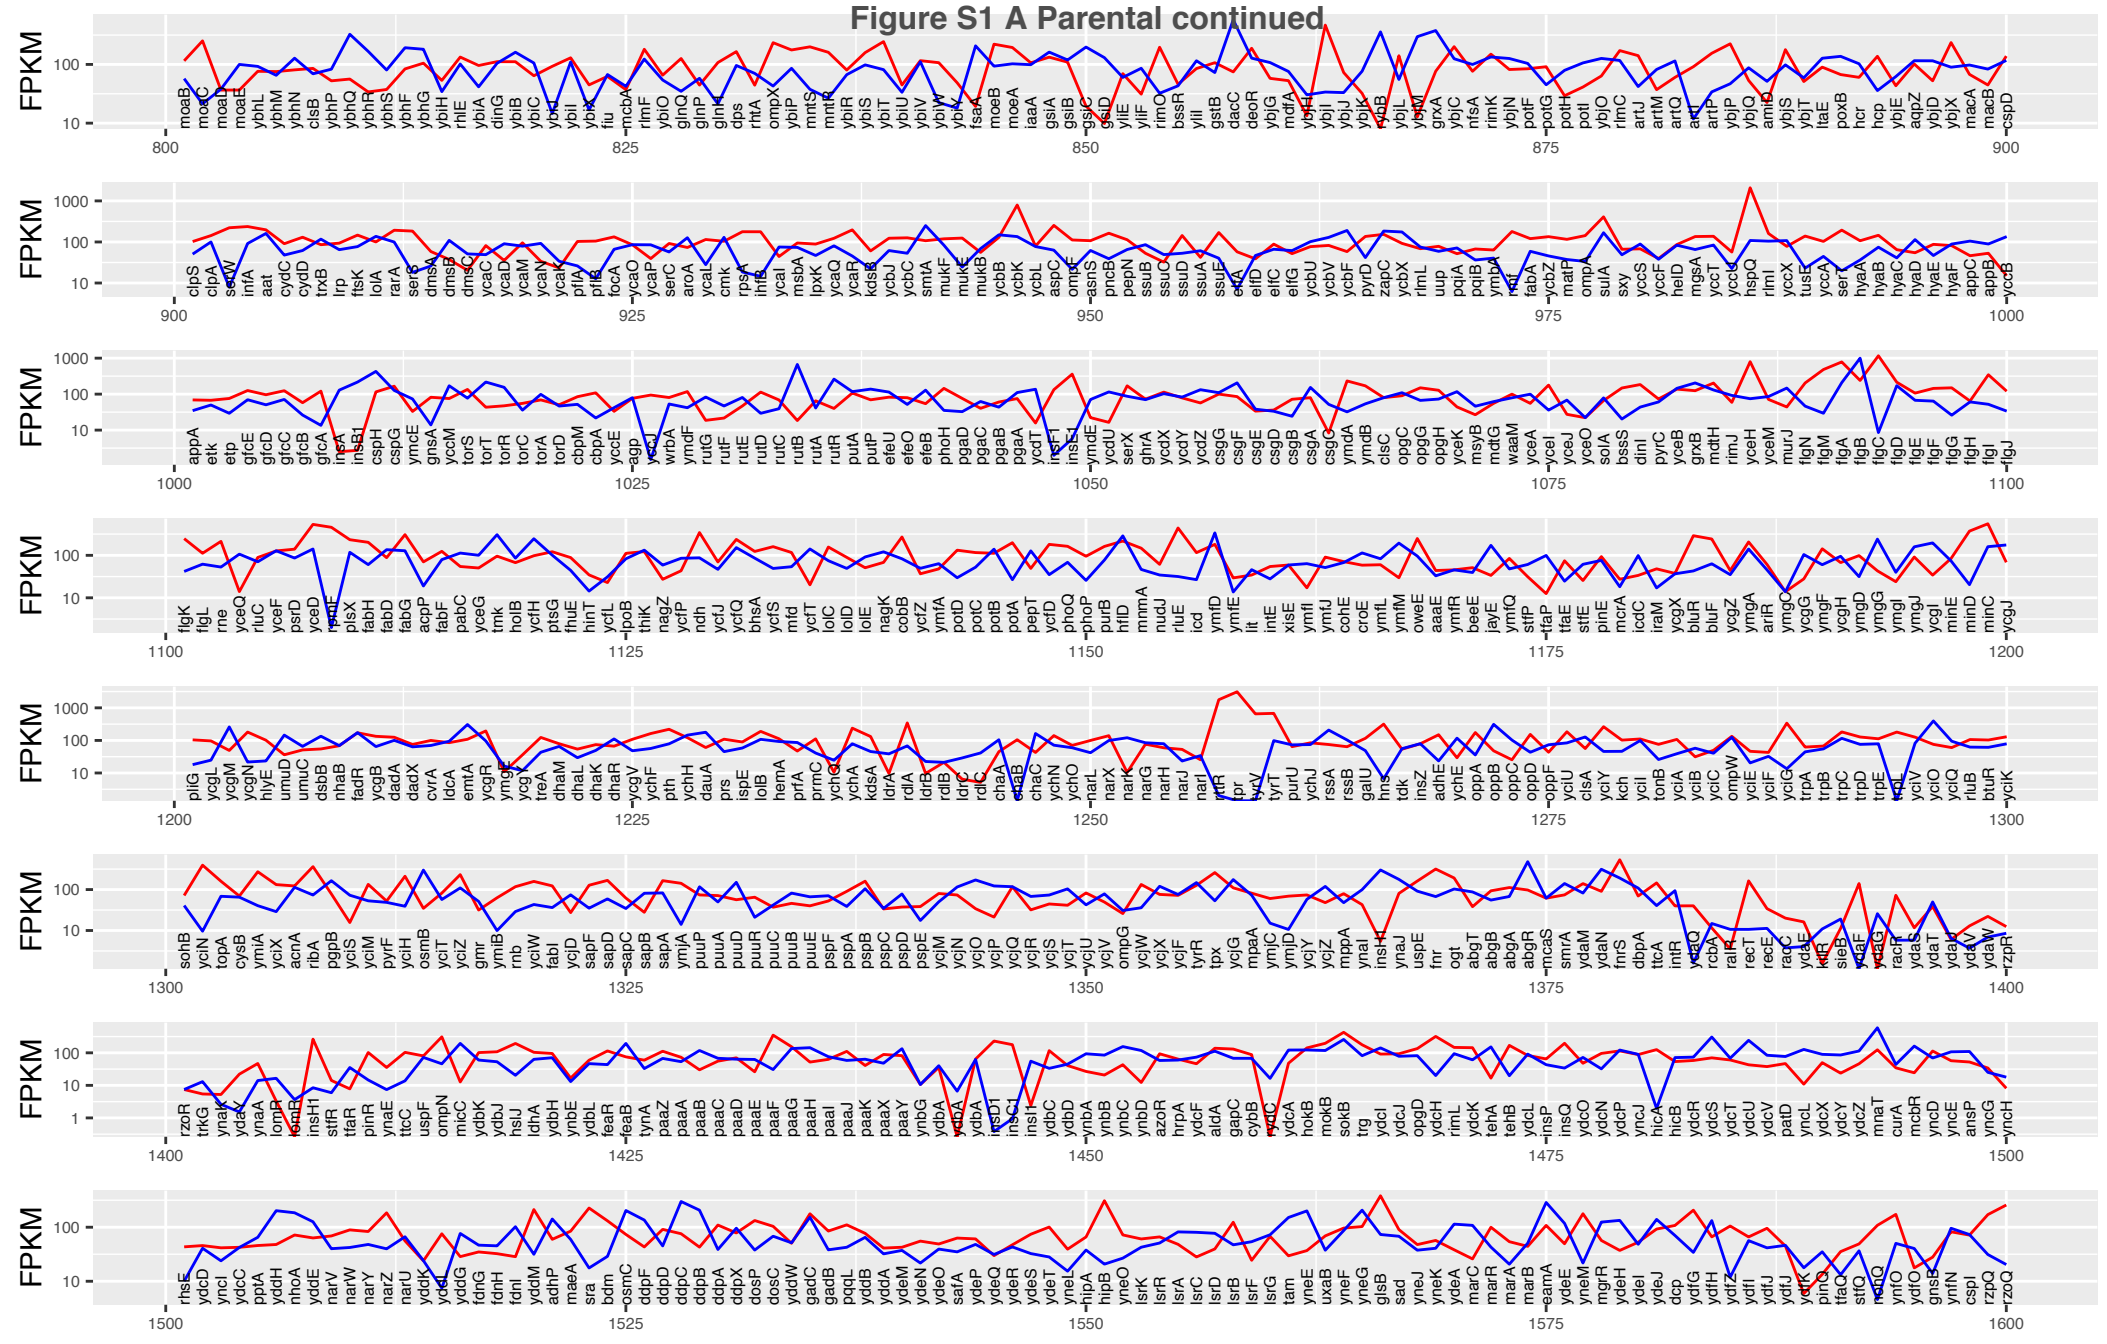

Figure S1 A Parental continued

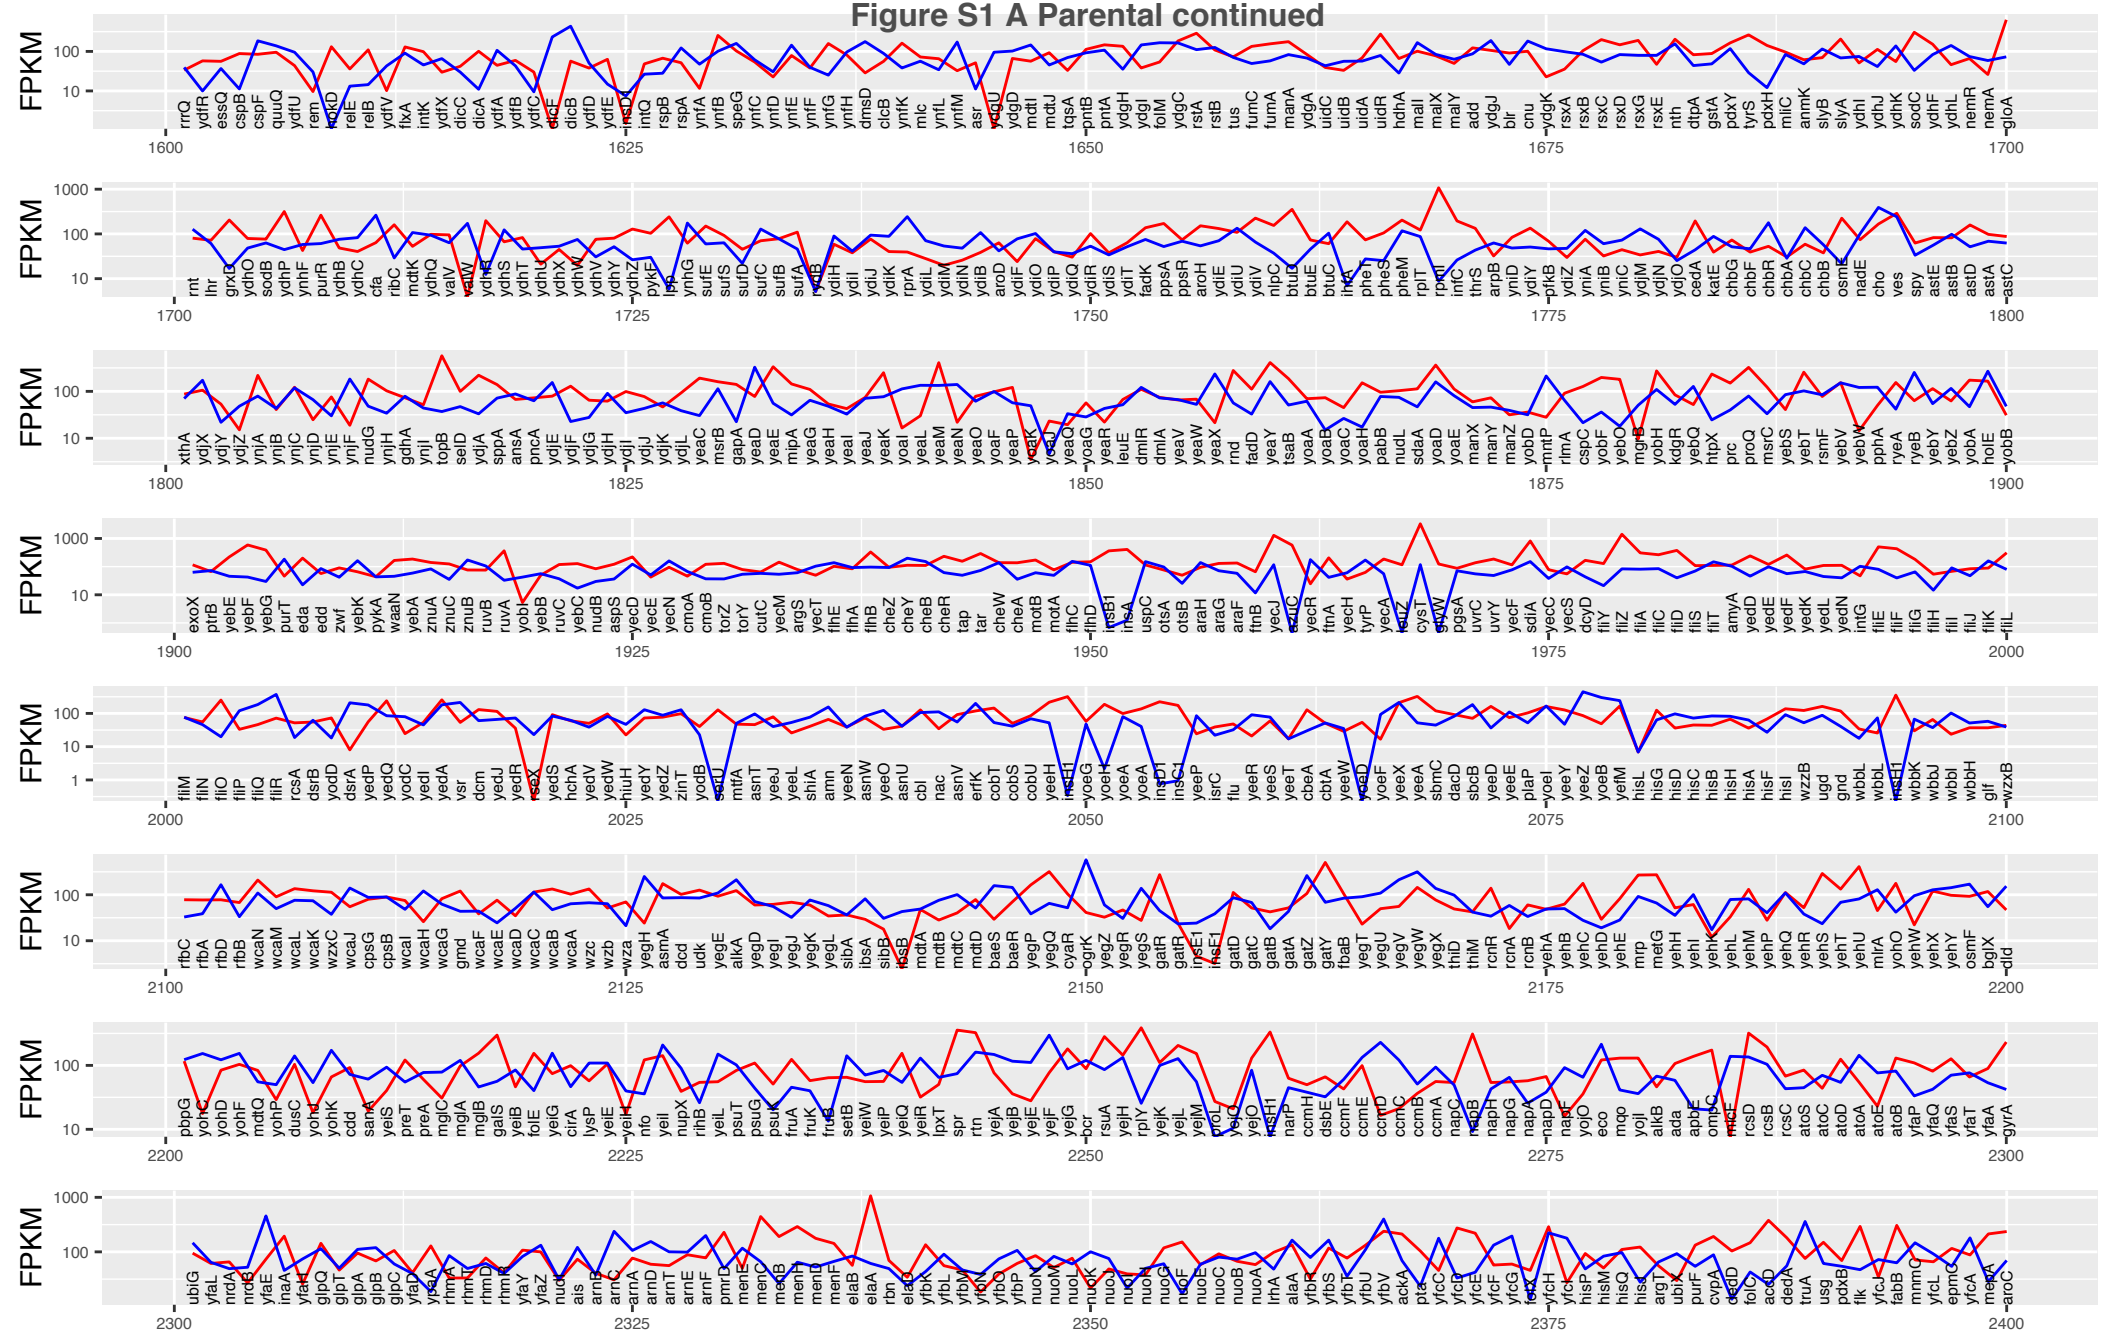











# Figure S1 B *phr* - continued

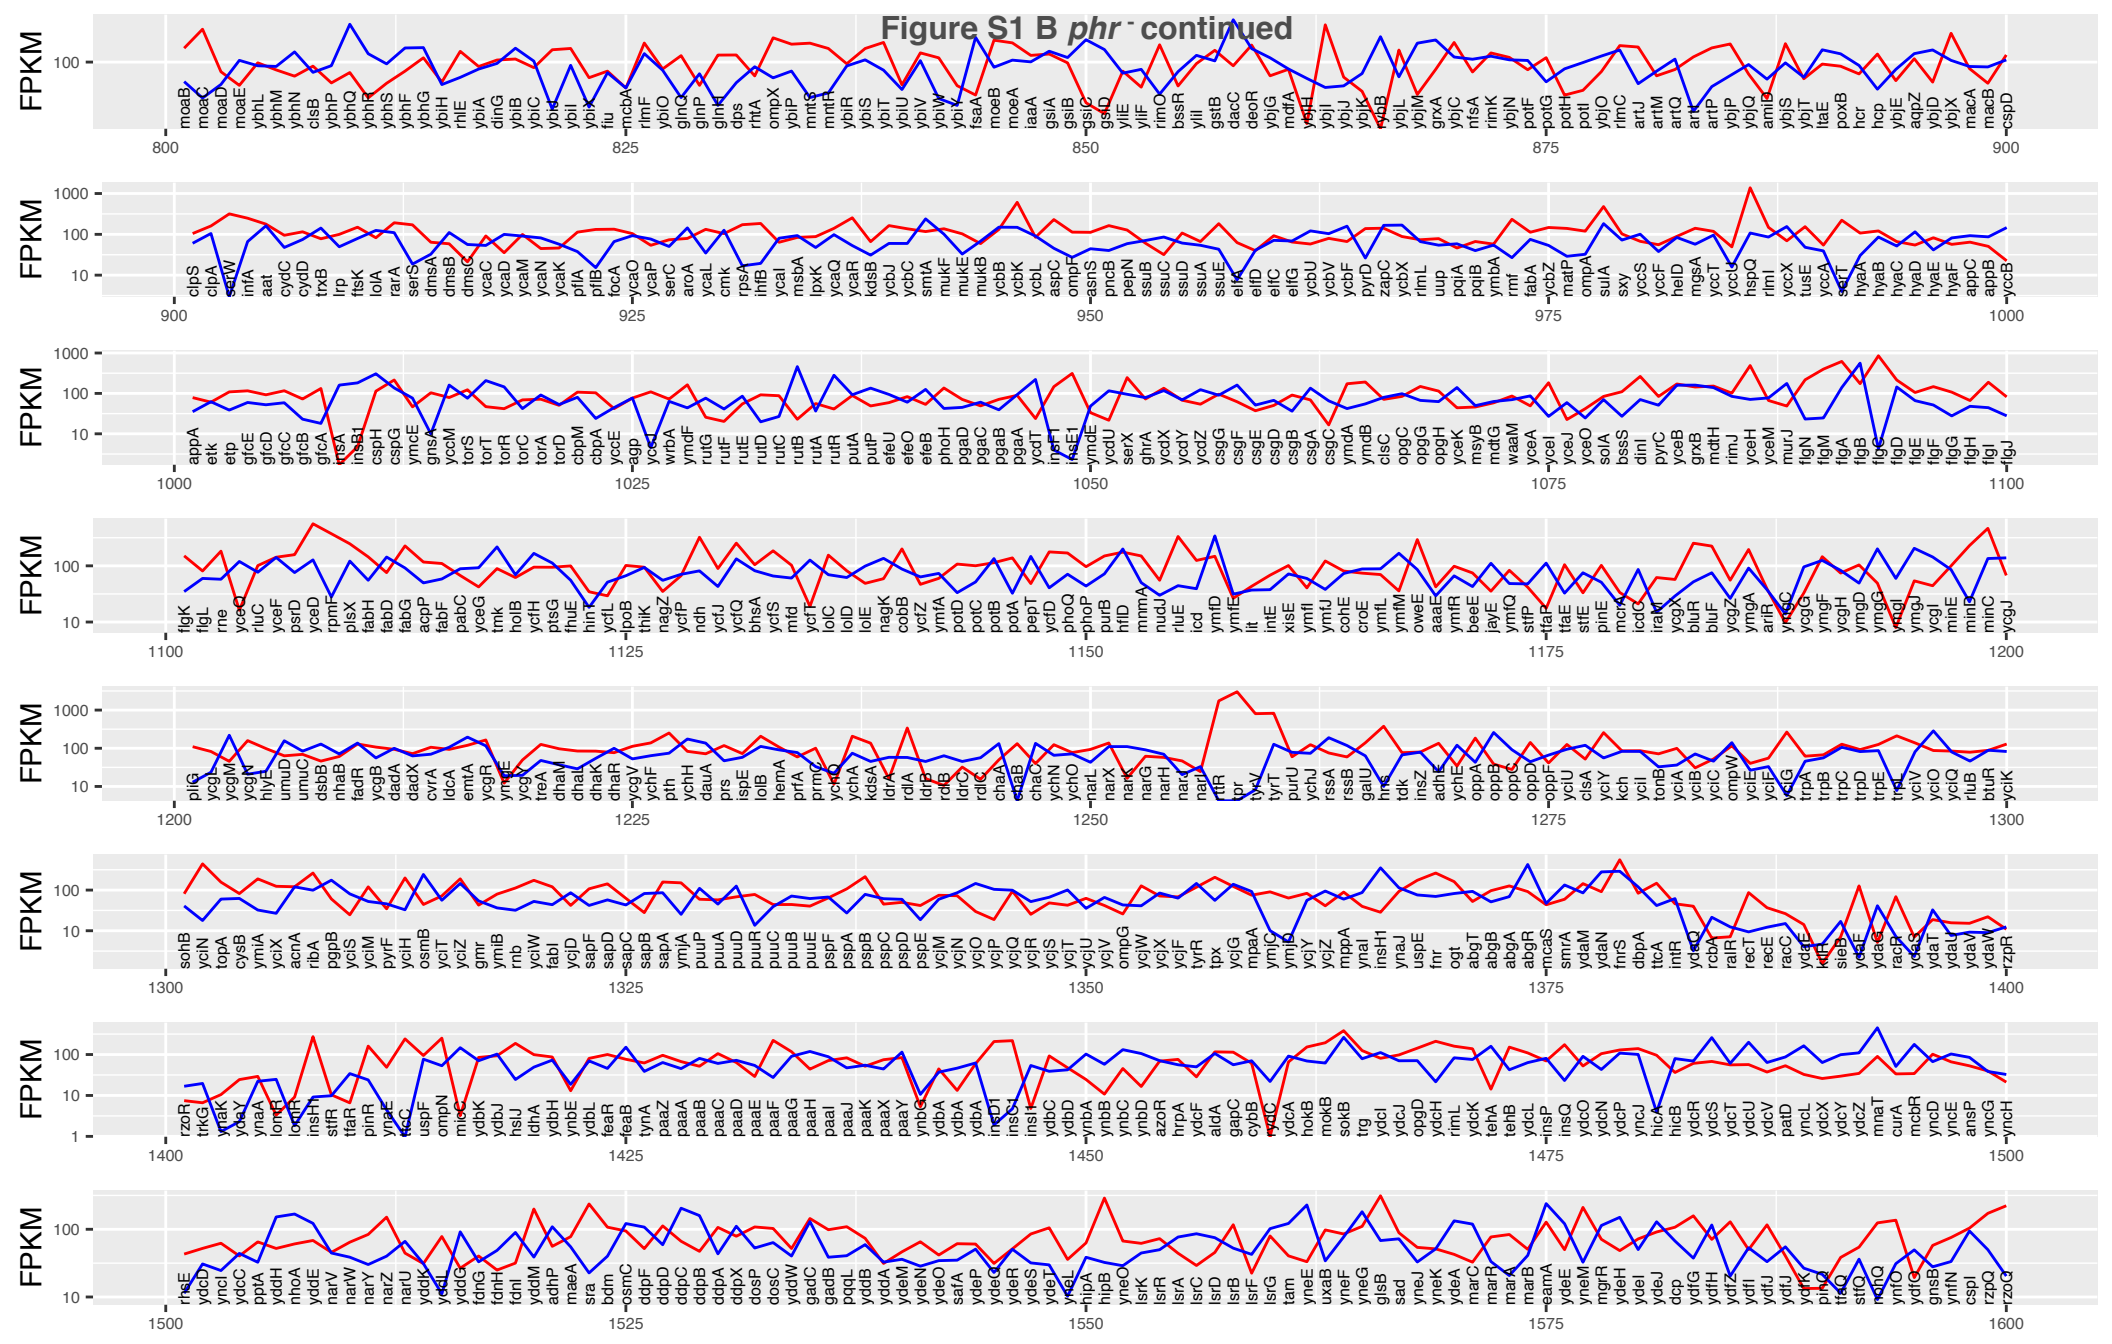







Figure S1 B *phr* - continued

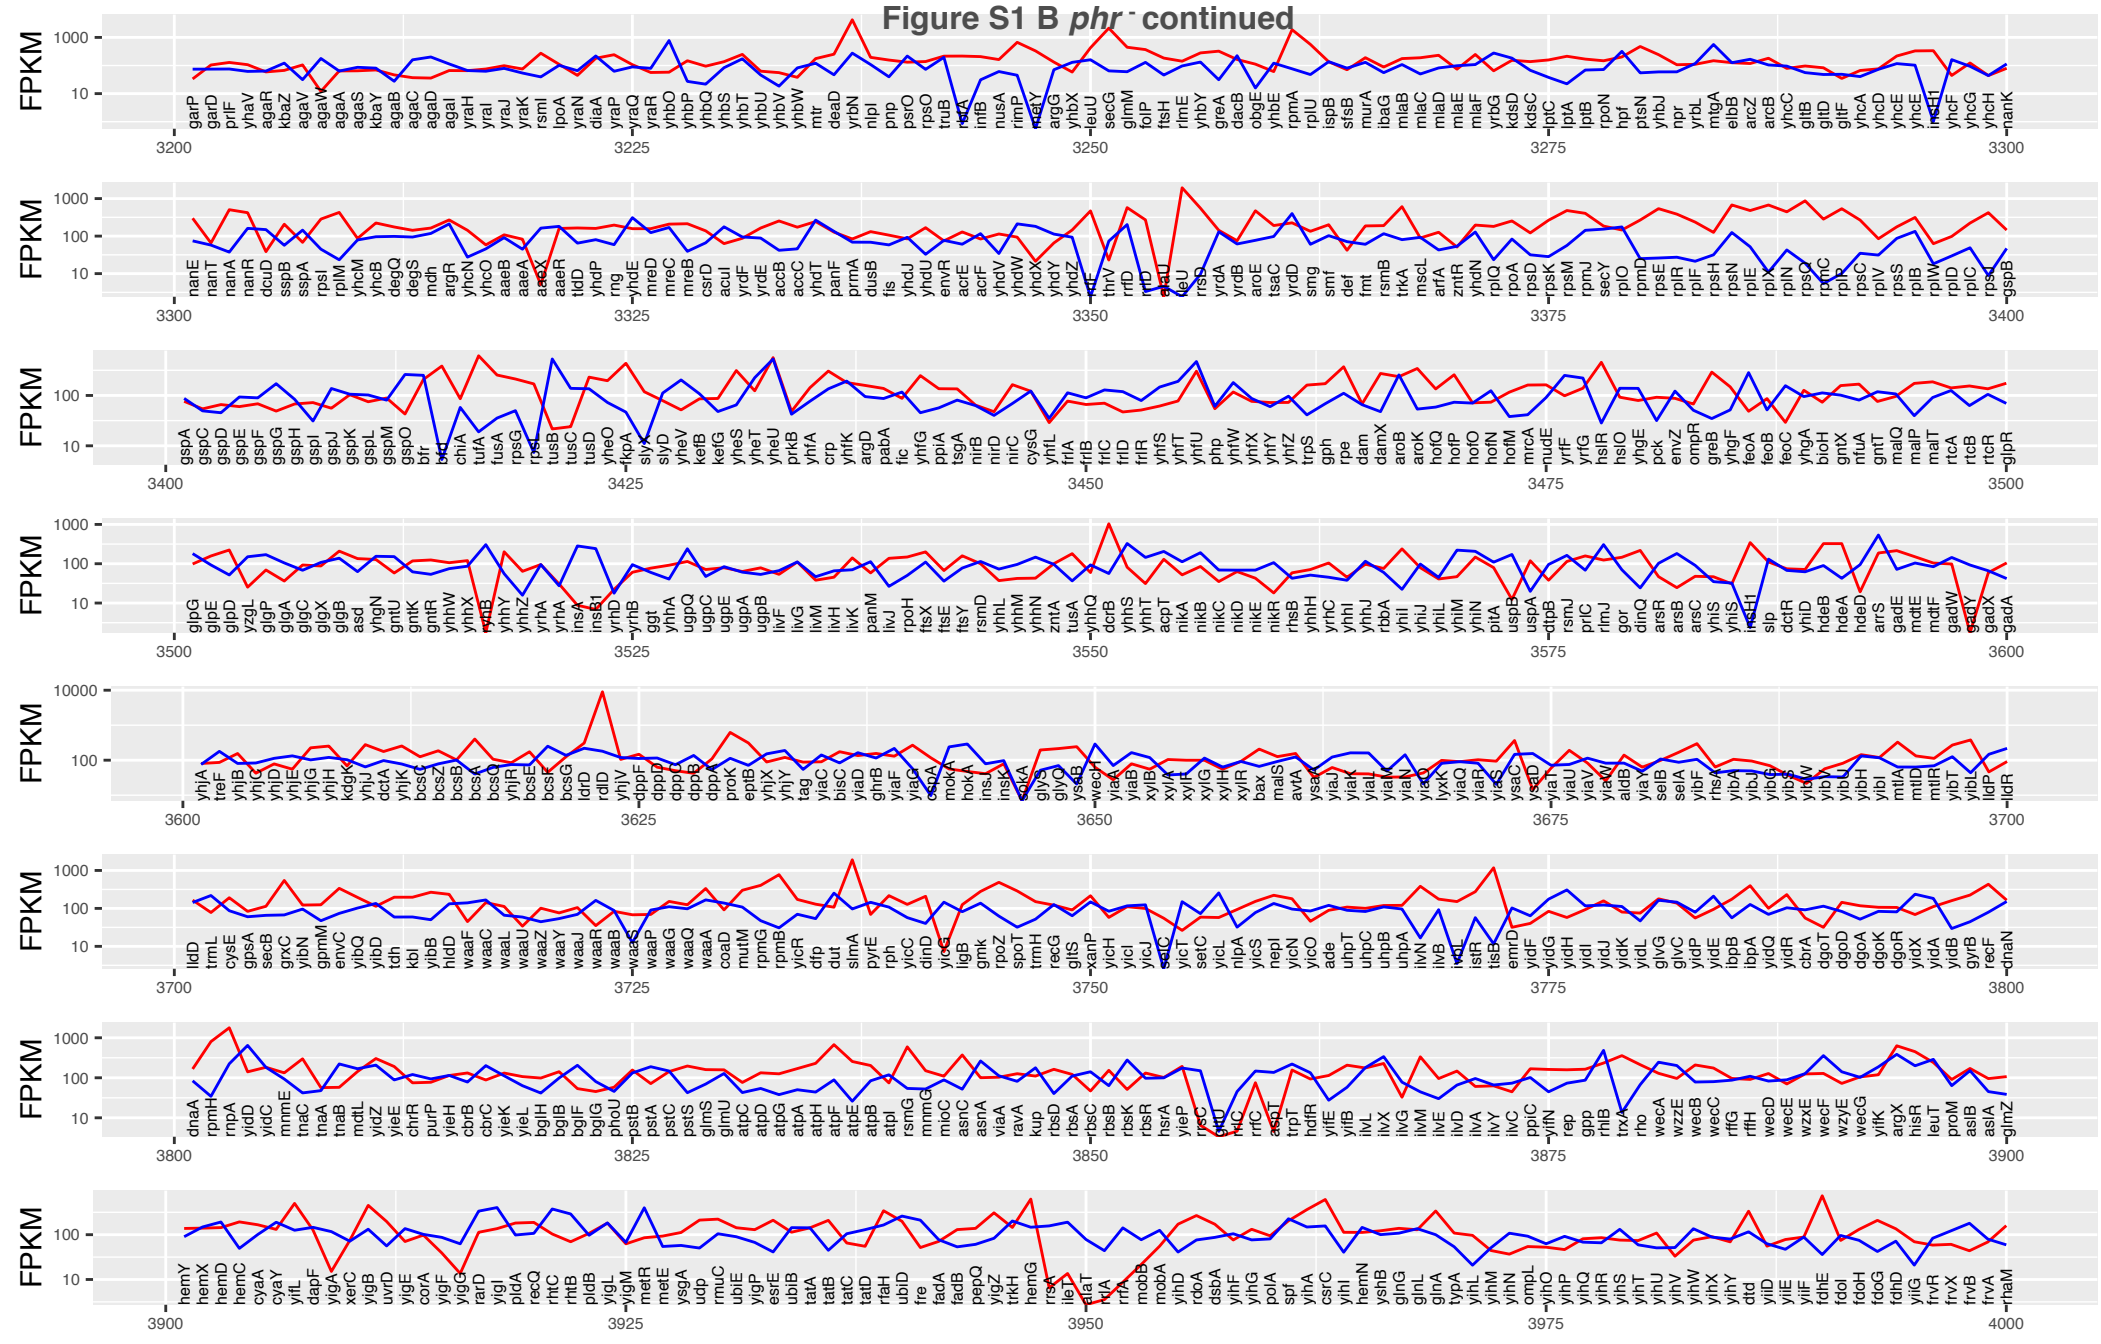

Figure S1 B *phr* - continued

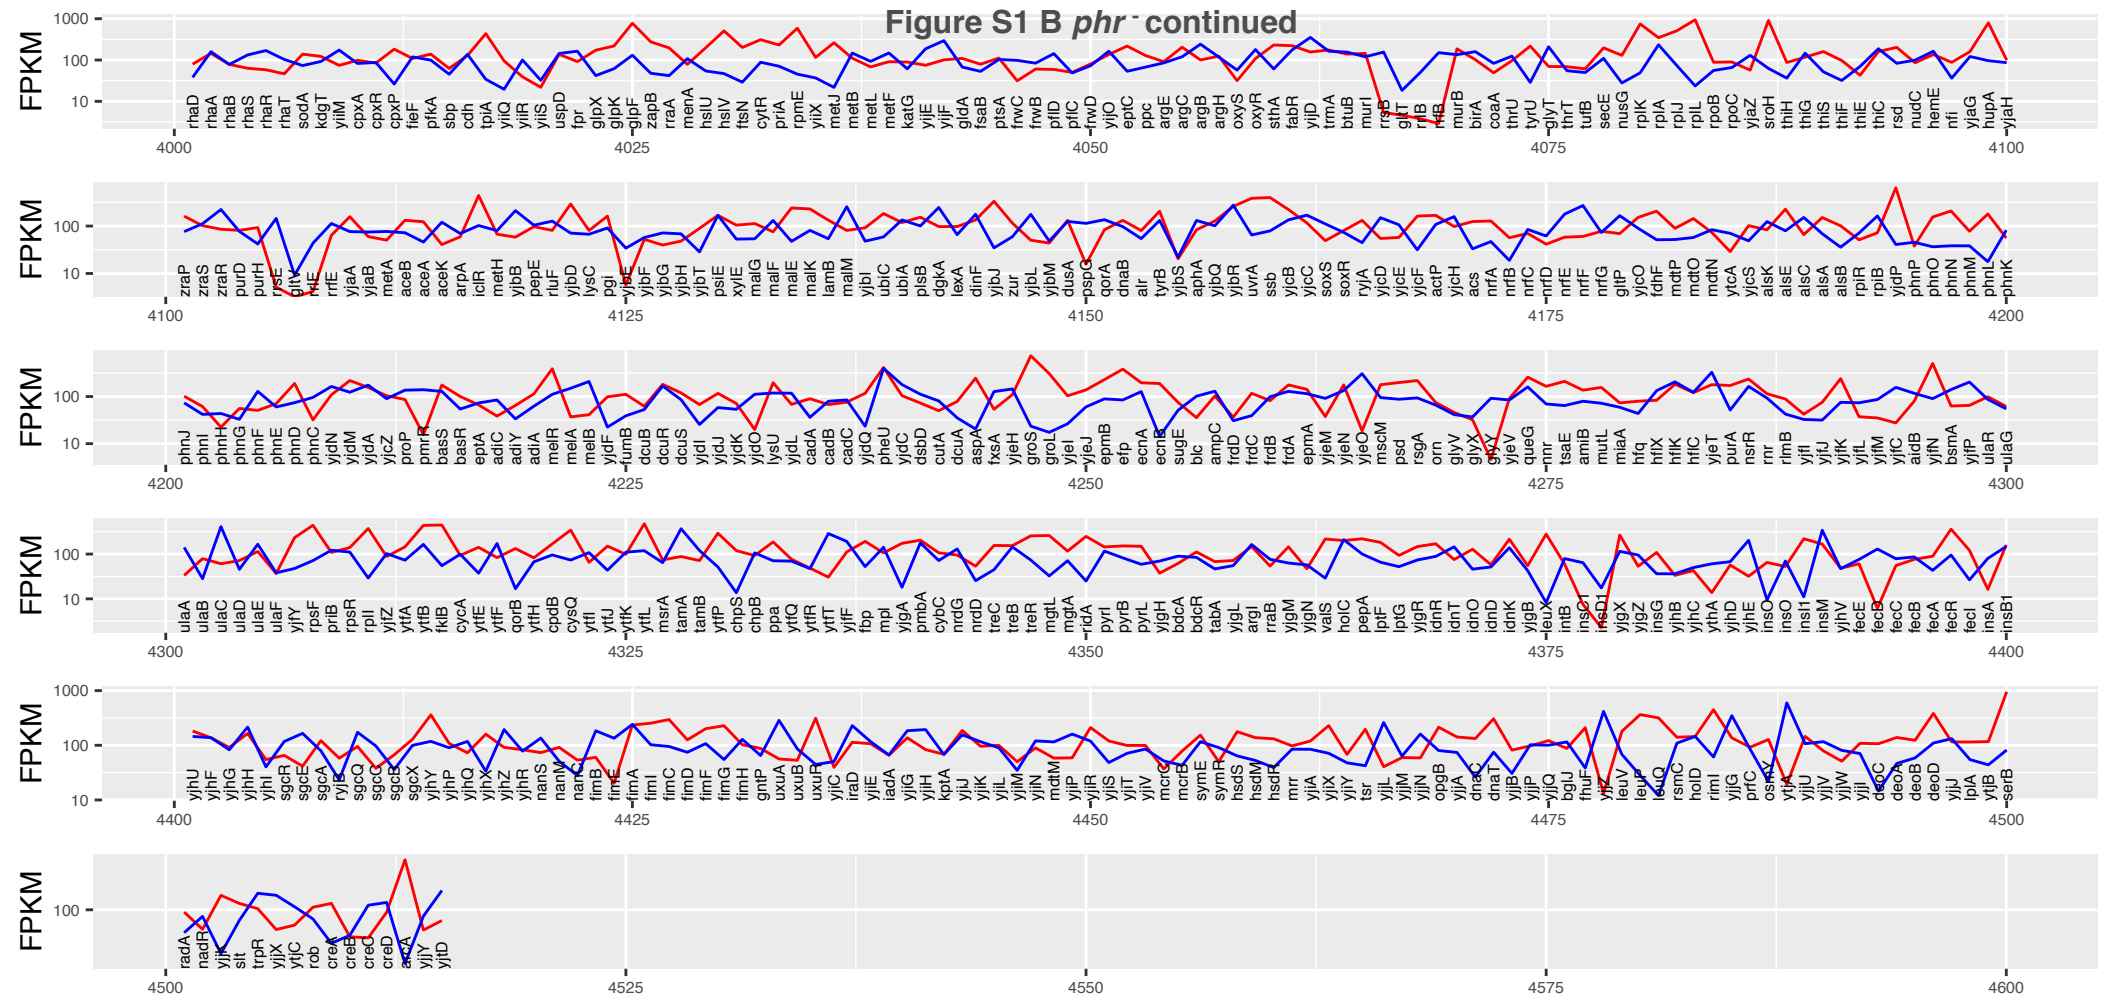



















# Figure S1 D *uvrD*-continued

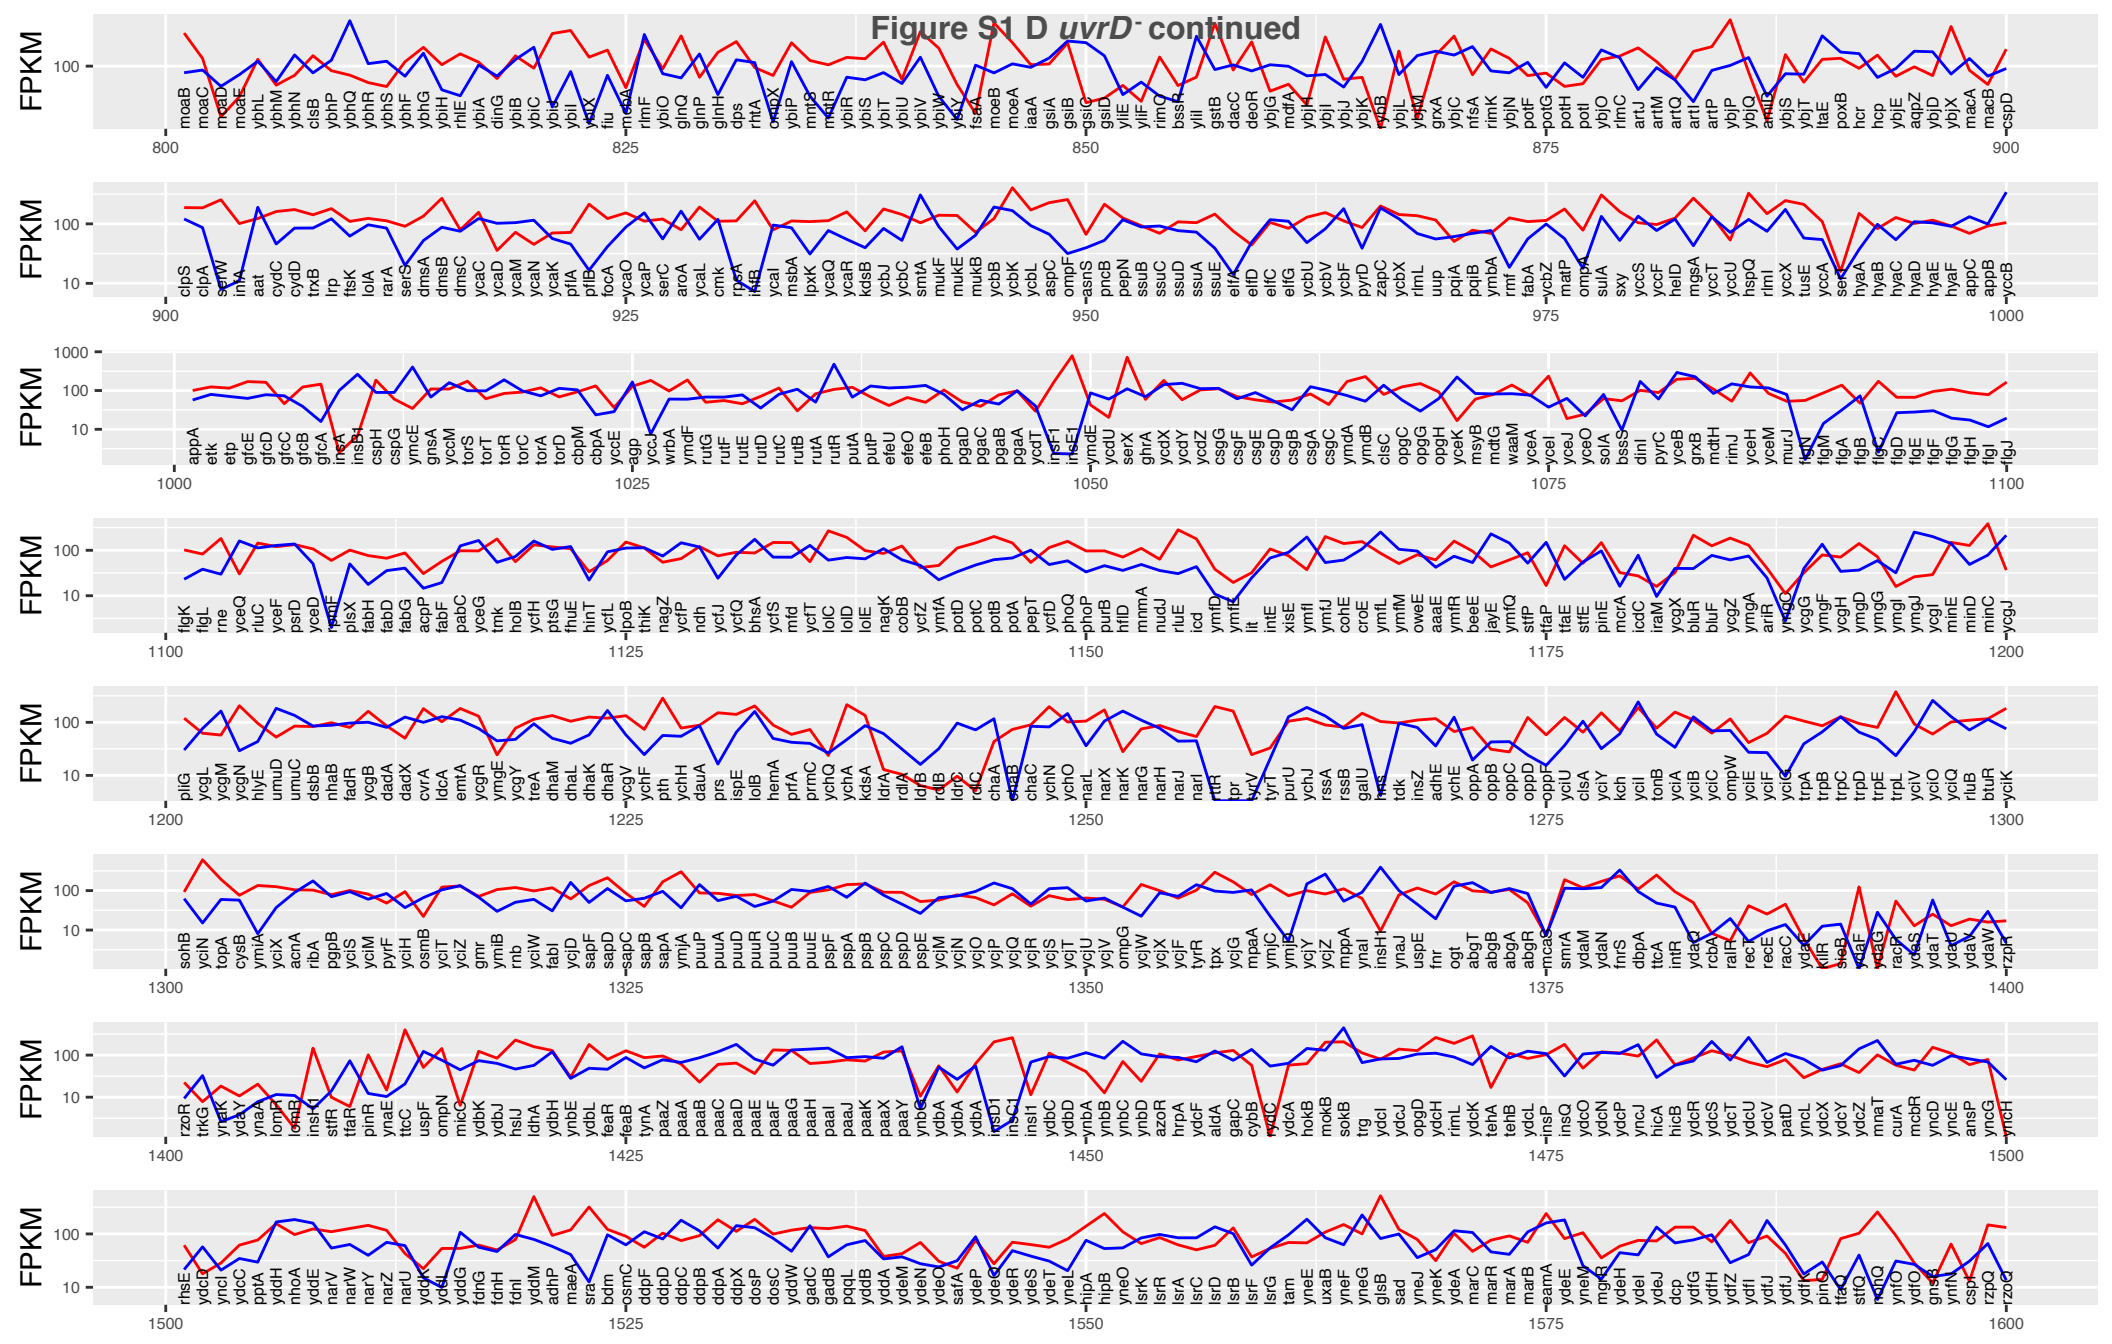



# Figure S1 D *uvrD*-continued

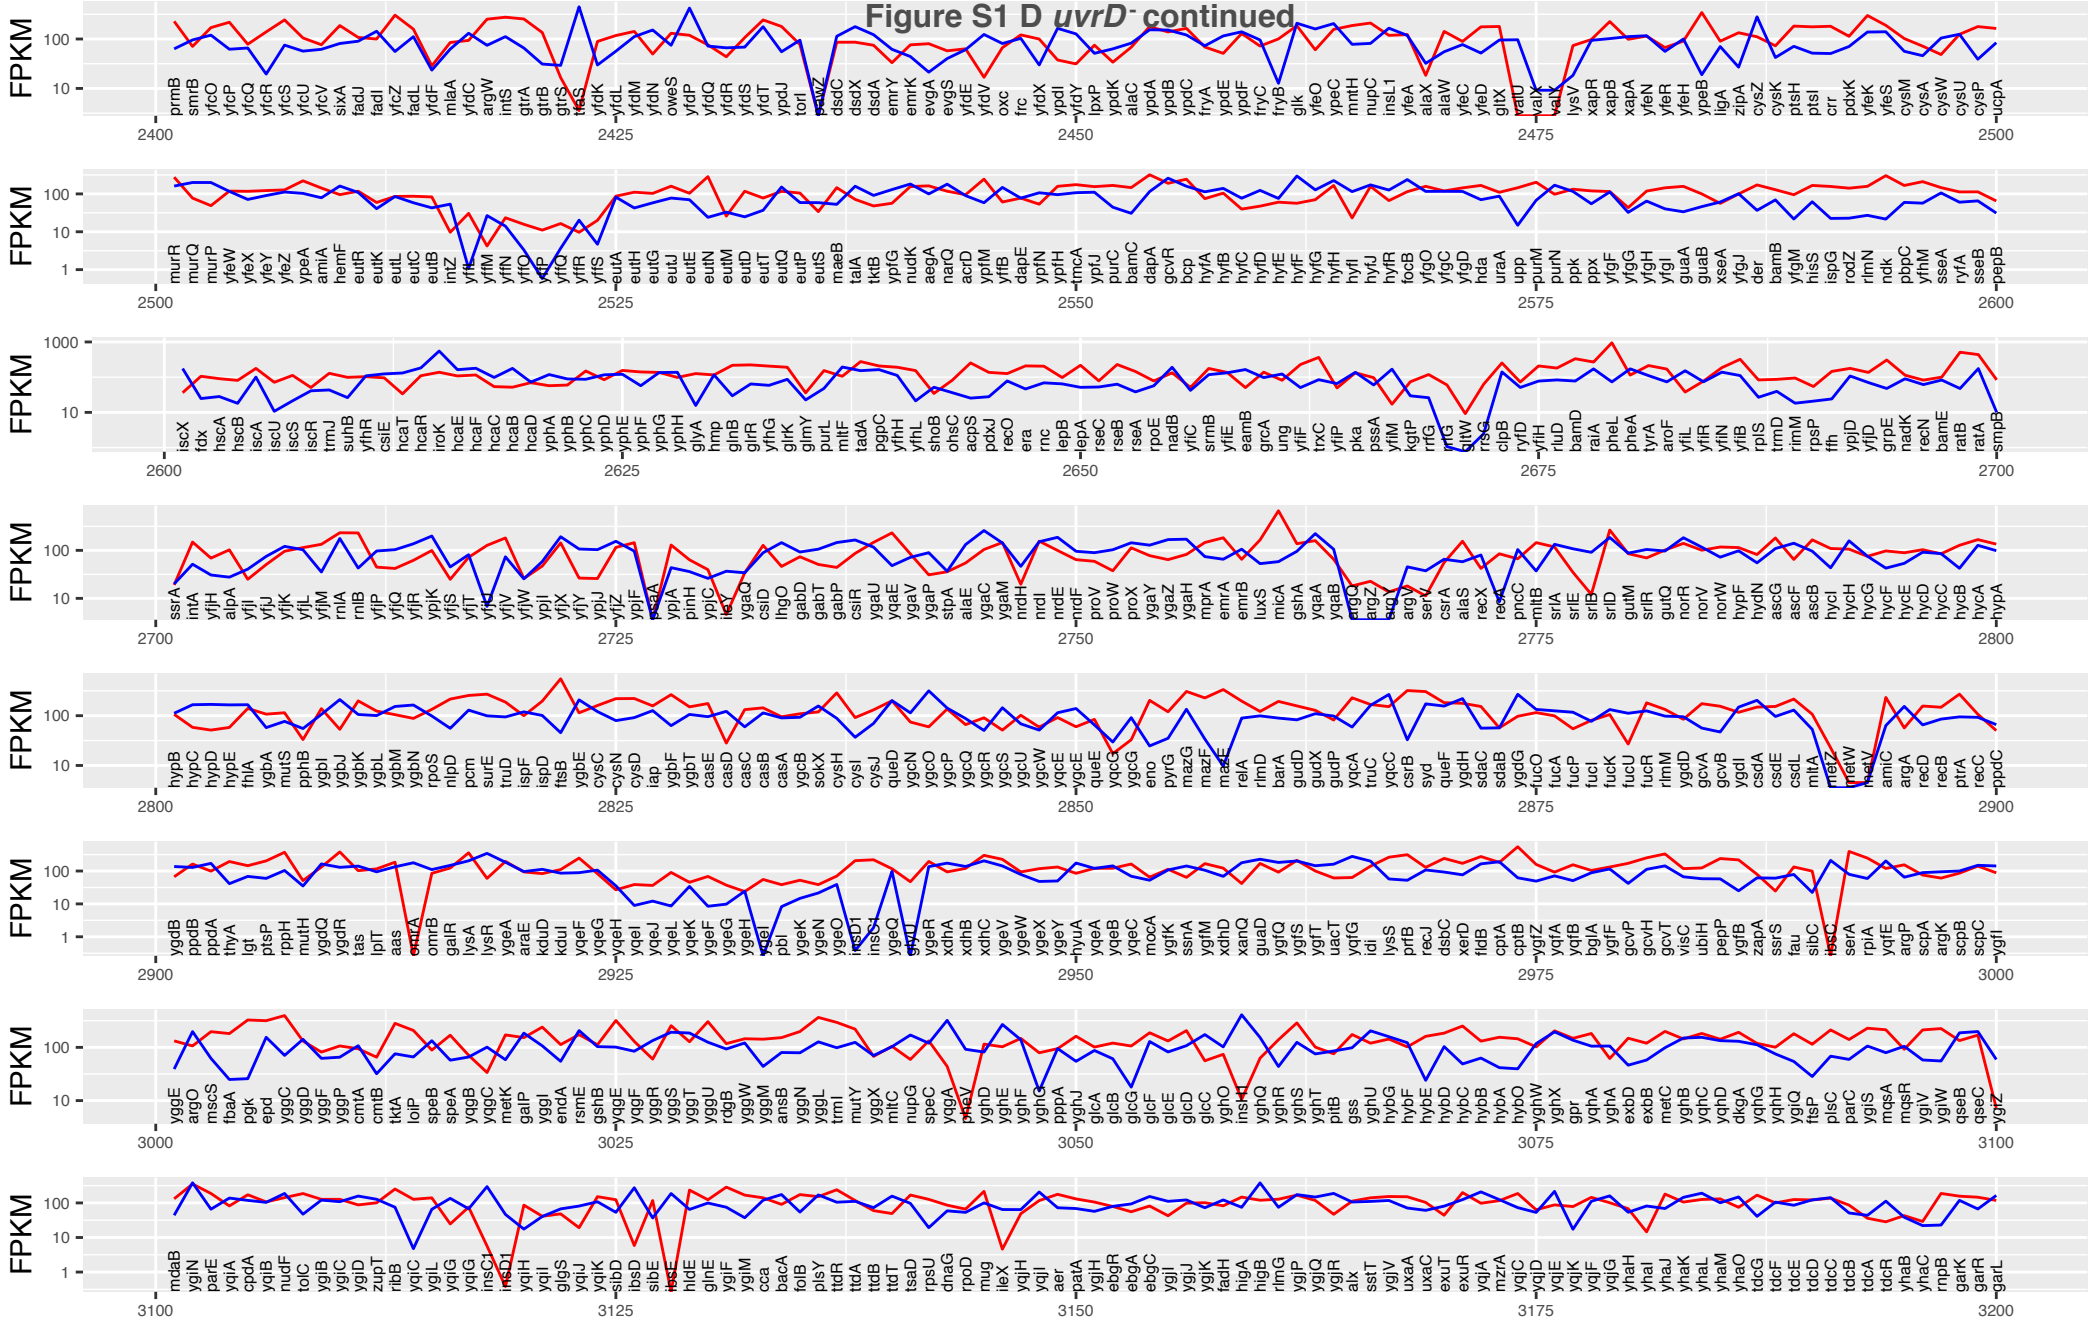

Supplement: pnas.1700230114.sd01.pdf [file pnas.1700230114.sd01.pdf]
